# Supplementary material
Source: HighWire-hosted journal article supplement (https://erj.ersjournals.com/content/58/4/2004605)

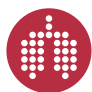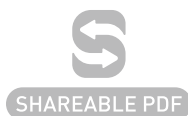

# Impact of baseline patient characteristics on dupilumab efficacy in type 2 asthma

William W. Busse<sup>1</sup>, Pierluigi Paggiaro<sup>2</sup>, Xavier Muñoz<sup>3</sup>, Thomas B. Casale<sup>4</sup>, Mario Castro<sup>5</sup>, G. Walter Canonica<sup>6</sup>, Jo A. Douglass<sup>7,8</sup>, Yuji Tohda<sup>9</sup>, Nadia Daizadeh<sup>10</sup>, Benjamin Ortiz<sup>11</sup> and Nami Pandit-Abid<sup>12</sup>

<sup>1</sup>UW Allergy, Pulmonary and Critical Care Medicine, University of Wisconsin School of Medicine and Public Health, Madison, WI, USA. <sup>2</sup>University of Pisa, Pisa, Italy. <sup>3</sup>Pneumology Dept, Hospital Vall d'Hebron, Barcelona, Spain. <sup>4</sup>University of South Florida, Tampa, FL, USA. <sup>5</sup>University of Kansas School of Medicine, Kansas City, KS, USA. <sup>6</sup>Humanitas University and Research Hospital-IRCCS, Milan, Italy. <sup>7</sup>Royal Melbourne Hospital, Melbourne, Australia. <sup>8</sup>The University of Melbourne, Melbourne, Australia. <sup>9</sup>Faculty of Medicine, Kindai University Hospital, Osakasayama, Japan. <sup>10</sup>Sanofi, Cambridge, MA, USA. <sup>11</sup>Regeneron Pharmaceuticals, Inc., Tarrytown, NY, USA. <sup>12</sup>Sanofi, Bridgewater, NJ, USA.

William W. Busse ([wwb@medicine.wisc.edu](mailto:wwb@medicine.wisc.edu))

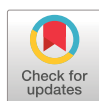

Shareable abstract (@ERSpublications)

**Dupilumab treatment versus placebo improved exacerbation rate and lung function outcomes in patients with uncontrolled moderate-to-severe asthma and high type 2 biomarkers at baseline, regardless of baseline characteristics in the phase 3 QUEST study** <https://bit.ly/3yR7MID>

**Cite this article as:** Busse WW, Paggiaro P, Muñoz X, *et al.* Impact of baseline patient characteristics on dupilumab efficacy in type 2 asthma. *Eur Respir J* 2021; 58: 2004605 [DOI: 10.1183/13993003.04605-2020].

This single-page version can be shared freely online.

Copyright ©The authors 2021.

This version is distributed under the terms of the Creative Commons Attribution Non-Commercial Licence 4.0. For commercial reproduction rights and permissions contact [permissions@ersnet.org](mailto:permissions@ersnet.org)

Received: 22 Dec 2020  
Accepted: 23 May 2021

*To the Editor:*

Severe asthma affects an estimated 5–10% of the total asthma patient population [1]. Various demographic factors, such as sex, age, obesity and age of onset, have been associated with asthma disease severity [2, 3], and the efficacy of asthma treatments has previously been found to vary depending on patient demographics [4, 5].

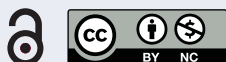

Supplement: inline-supplementary-material-1 [file inline-supplementary-material-1.pdf]
